# Supplementary material for: Adverse reactions of immune checkpoint inhibitors combined with glucocorticoids: a pharmacovigilance analysis of drug-drug interactions
Source: Research Square preprint supplement (doi:10.21203/rs.3.rs-6637692/v1), 2025-10-28
Supplement: Supplementary file 1 [file b1a11bc8820ec6af6916c1f6.docx]

**Table 1** Characteristics of patients administered ICIs combined with GCs from FAERS

| Characteristics | Overall |
| --- | --- |
| Total number of cases | (N=10663) |
| Patient’s age, years, median (Q1-Q3) | 65, (56-72) |
| <18 years | 75 (0.7%) |
| 18–65 years | 4405 (41.3%) |
| ≥ 65 years | 4748 (44.5%) |
| Unknown | 1435 (13.5%) |
| Patient’s sex [n (%)] |  |
| Male | 6205 (58.2%) |
| Female | 4086 (38.3%) |
| Unknown | 372 (3.5%) |
| Type of reporter |  |
| Health professional | 8712 (83.3%) |
| Non-health professional | 1700 (15.9%) |
| Unknown | 74 (0.7%) |
| Outcome |  |
| Hospitalization | 4830 (45.3%) |
| Life-threatening | 738 (6.9%) |
| Death | 2369 (22.2%) |
| Other Serious (Important Medical Event) | 1727 (16.2%) |
| Reported regions |  |
| North America | 4767 (45.5%) |
| South America | 175 (1.6%) |
| Europe | 3399 (32.4%) |
| Asia | 1668 (15.9%) |
| Oceania | 425 (4.0%) |
| Unknown | 229 (2.1%) |
| Reported year |  |
| 2014 | 173 |
| 2015 | 575 |
| 2016 | 570 |
| 2017 | 769 |
| 2018 | 1183 |
| 2019 | 1189 |
| 2020 | 1322 |
| 2021 | 1384 |
| 2022 | 1405 |
| 2023 | 1270 |
| 2024 | 823 |

Table 2 Reporting odds ratios and DDI approaches for ICIs and GCs.

| SOC | Exposure | Cases | Non-cases | ROR (95%Cl) | | Additive Model | Multiplicative Model | | Ω Shrinkage Measure Model | Chi-square Statistics Model | |
| --- | --- | --- | --- | --- | --- | --- | --- | --- | --- | --- | --- |
| Blood and lymphatic system disorders | No ICI, no GCs | 660272 | 40040694 | reference | 0.0288 | | 1.8447 | 1.8447 | | | -14.3968 |
| ICI, GCs | 725 | 17567 | 2.46 ( 2.28 - 2.64 ) |  | |  |  | | |  |
| ICI, no GCs | 14302 | 378153 | 2.28 ( 2.24 - 2.31 ) |  | |  |  | | |  |
| GCs, no ICI | 7315 | 144243 | 3.04 ( 2.97 - 3.11 ) |  | |  |  | | |  |
| Cardiac disorders | No ICI, no GCs | 908961 | 39792005 | reference | 0.0014 | | 1.7272 | -0.3187 | | | -0.4836 |
| ICI, GCs | 507 | 17785 | 1.25 ( 1.14 - 1.36 ) |  | |  |  | | |  |
| ICI, no GCs | 11103 | 381352 | 1.27 ( 1.25 - 1.3 ) |  | |  |  | | |  |
| GCs, no ICI | 3081 | 148477 | 0.91 ( 0.87 - 0.94 ) |  | |  |  | | |  |
| Congenital, familial and genetic disorders | No ICI, no GCs | 115127 | 40585839 | reference | 0 | | 0.0208 | -5.2611 | | | -6.2895 |
| ICI, GCs | 7 | 18285 | 0.14 ( 0.06 - 0.29 ) |  | |  |  | | |  |
| ICI, no GCs | 166 | 392289 | 0.15 ( 0.13 - 0.17 ) |  | |  |  | | |  |
| GCs, no ICI | 417 | 151141 | 0.98 ( 0.89 - 1.08 ) |  | |  |  | | |  |
| Ear and labyrinth disorders | No ICI, no GCs | 178935 | 40522031 | reference | **0.0021** | | 0.4381 | -1.8442 | | | -4.1168 |
| ICI, GCs | 44 | 18248 | 0.55 ( 0.41 - 0.74 ) |  | |  |  | | |  |
| ICI, no GCs | 819 | 391636 | 0.47 ( 0.44 - 0.51 ) |  | |  |  | | |  |
| GCs, no ICI | 395 | 151163 | 0.59 ( 0.54 - 0.66 ) |  | |  |  | | |  |
| Endocrine disorders | No ICI, no GCs | 89927 | 40611039 | reference | -0.0147 | | **44.146** | -0.8434 | | | -9.1541 |
| ICI, GCs | 540 | 17752 | 11.86 ( 10.88 - 12.92 ) |  | |  |  | | |  |
| ICI, no GCs | 13980 | 378475 | 16.35 ( 16.06 - 16.65 ) |  | |  |  | | |  |
| GCs, no ICI | 1634 | 149924 | 4.28 ( 4.07 - 4.49 ) |  | |  |  | | |  |
| Eye disorders | No ICI, no GCs | 814407 | 39886559 | reference | **0.0023** | | 0.4411 | -0.9091 | | | -5.672 |
| ICI, GCs | 258 | 18034 | 0.7 ( 0.62 - 0.8 ) |  | |  |  | | |  |
| ICI, no GCs | 4804 | 387651 | 0.61 ( 0.59 - 0.62 ) |  | |  |  | | |  |
| GCs, no ICI | 2965 | 148593 | 0.98 ( 0.95 - 1.02 ) |  | |  |  | | |  |
| Gastrointestinal disorders | No ICI, no GCs | 3416122 | 37284844 | reference | **0.0447** | | **2.4402** | **0.0783** | | | **7** |
| ICI, GCs | 2105 | 16187 | **1.42 ( 1.36 - 1.48 )** |  | |  |  | | |  |
| ICI, no GCs | 38768 | 353687 | 1.2 ( 1.19 - 1.21 ) |  | |  |  | | |  |
| GCs, no ICI | 8412 | 143146 | 0.64 ( 0.63 - 0.65 ) |  | |  |  | | |  |
| General disorders and administration site conditions | No ICI, no GCs | 7323149 | 33377817 | reference | -0.0296 | | 0.5886 | -0.659 | | | -17.8561 |
| ICI, GCs | 2375 | 15917 | 0.68 ( 0.65 - 0.71 ) |  | |  |  | | |  |
| ICI, no GCs | 59823 | 332632 | 0.82 ( 0.81 - 0.83 ) |  | |  |  | | |  |
| GCs, no ICI | 28324 | 123234 | 1.05 ( 1.04 - 1.06 ) |  | |  |  | | |  |
| Hepatobiliary disorders | No ICI, no GCs | 326375 | 40374591 | reference | -0.0059 | | **14.7427** | -0.5179 | | | -4.0922 |
| ICI, GCs | 571 | 17721 | 3.86 ( 3.55 - 4.19 ) |  | |  |  | | |  |
| ICI, no GCs | 14004 | 378451 | 4.57 ( 4.49 - 4.65 ) |  | |  |  | | |  |
| GCs, no ICI | 1428 | 150130 | 1.14 ( 1.08 - 1.2 ) |  | |  |  | | |  |
| Immune system disorders | No ICI, no GCs | 484312 | 40216654 | reference | -0.0077 | | 0.4887 | -1.3164 | | | -8.6562 |
| ICI, GCs | 203 | 18089 | 0.93 ( 0.81 - 1.07 ) |  | |  |  | | |  |
| ICI, no GCs | 4145 | 388310 | 0.88 ( 0.86 - 0.91 ) |  | |  |  | | |  |
| GCs, no ICI | 3055 | 148503 | 1.71 ( 1.65 - 1.77 ) |  | |  |  | | |  |
| Infections and infestations  Injury, poisoning and procedural complications | No ICI, no GCs | 2198380 | 38502586 | reference | -0.0696 | | 0.5088 | -1.1164 | | | -24.9266 |
| ICI, GCs | 1403 | 16889 | 1.45 ( 1.37 - 1.53 ) |  | |  |  | | |  |
| ICI, no GCs | 20731 | 371724 | 0.97 ( 0.96 - 0.98 ) |  | |  |  | | |  |
| GCs, no ICI | 22346 | 129212 | 3.03 ( 2.99 - 3.07 ) |  | |  |  | | |  |
| No ICI, no GCs | 4408513 | 36292453 | reference | **0.0004** | | 0.3809 | -1.2439 | | | -22.7983 |
| ICI, GCs | 967 | 17325 | 0.46 ( 0.43 - 0.49 ) |  | |  |  | | |  |
| ICI, no GCs | 27663 | 364792 | 0.62 ( 0.62 - 0.63 ) |  | |  |  | | |  |
| GCs, no ICI | 13688 | 137870 | 0.82 ( 0.81 - 0.84 ) |  | |  |  | | |  |
| Investigations | No ICI, no GCs | 2376572 | 38324394 | reference | **0.0226** | | **1.9618** | **0.0197** | | | **5.018** |
| ICI, GCs | 1411 | 16881 | **1.35 ( 1.28 - 1.42 )** |  | |  |  | | |  |
| ICI, no GCs | 26480 | 365975 | 1.17 ( 1.15 - 1.18 ) |  | |  |  | | |  |
| GCs, no ICI | 6886 | 144672 | 0.77 ( 0.75 - 0.79 ) |  | |  |  | | |  |
| Metabolism and nutrition disorders | No ICI, no GCs | 833491 | 39867475 | reference | **0.0031** | | **3.5787** | -0.1137 | | | **2.1129** |
| ICI, GCs | 915 | 17377 | **2.49 ( 2.33 - 2.66 )** |  | |  |  | | |  |
| ICI, no GCs | 15714 | 376741 | 1.99 ( 1.96 - 2.02 ) |  | |  |  | | |  |
| GCs, no ICI | 4142 | 147416 | 1.33 ( 1.29 - 1.37 ) |  | |  |  | | |  |
| Musculoskeletal and connective tissue disorders | No ICI, no GCs | 2152996 | 38547970 | reference | **0.0164** | | 0.8313 | -0.6051 | | | -7.0117 |
| ICI, GCs | 750 | 17542 | 0.77 ( 0.71 - 0.83 ) |  | |  |  | | |  |
| ICI, no GCs | 15739 | 376716 | 0.75 ( 0.74 - 0.76 ) |  | |  |  | | |  |
| GCs, no ICI | 5667 | 145891 | 0.7 ( 0.68 - 0.72 ) |  | |  |  | | |  |
| Neoplasms benign, malignant and unspecified (incl cysts and polyps) | No ICI, no GCs | 1170301 | 39530665 | reference | -0.0261 | | **2.9217** | -0.8848 | | | -13.1184 |
| ICI, GCs | 814 | 17478 | 1.55 ( 1.45 - 1.67 ) |  | |  |  | | |  |
| ICI, no GCs | 25484 | 366971 | 2.34 ( 2.31 - 2.37 ) |  | |  |  | | |  |
| GCs, no ICI | 5213 | 146345 | 1.19 ( 1.16 - 1.22 ) |  | |  |  | | |  |
| Nervous system disorders | No ICI, no GCs | 3271613 | 37429353 | reference | **0.0322** | | 0.7925 | -0.5625 | | | -8.6802 |
| ICI, GCs | 1138 | 17154 | 0.76 ( 0.72 - 0.81 ) |  | |  |  | | |  |
| ICI, no GCs | 21923 | 370532 | 0.68 ( 0.67 - 0.69 ) |  | |  |  | | |  |
| GCs, no ICI | 8268 | 143290 | 0.66 ( 0.65 - 0.68 ) |  | |  |  | | |  |
| Pregnancy, puerperium and perinatal conditions | No ICI, no GCs | 161025 | 40539941 | reference | -0.0049 | | 0.0015 | -9.2742 | | | -12.4336 |
| ICI, GCs | 3 | 18289 | 0.04 ( 0.01 - 0.13 ) |  | |  |  | | |  |
| ICI, no GCs | 125 | 392330 | 0.08 ( 0.07 - 0.1 ) |  | |  |  | | |  |
| GCs, no ICI | 1322 | 150236 | 2.24 ( 2.12 - 2.36 ) |  | |  |  | | |  |
| Product issues | No ICI, no GCs | 739228 | 39961738 | reference | **0.0149** | | 0.0097 | -6.8178 | | | -17.651 |
| ICI, GCs | 11 | 18281 | 0.03 ( 0.02 - 0.06 ) |  | |  |  | | |  |
| ICI, no GCs | 343 | 392112 | 0.05 ( 0.04 - 0.05 ) |  | |  |  | | |  |
| GCs, no ICI | 452 | 151106 | 0.16 ( 0.15 - 0.18 ) |  | |  |  | | |  |
| Psychiatric disorders | No ICI, no GCs | 2216955 | 38484011 | reference | **0.0243** | | 0.1037 | -2.2185 | | | -22.7103 |
| ICI, GCs | 280 | 18012 | 0.27 ( 0.24 - 0.31 ) |  | |  |  | | |  |
| ICI, no GCs | 4806 | 387649 | 0.22 ( 0.21 - 0.22 ) |  | |  |  | | |  |
| GCs, no ICI | 5029 | 146529 | 0.6 ( 0.58 - 0.62 ) |  | |  |  | | |  |
| Renal and urinary disorders | No ICI, no GCs | 776676 | 39924290 | reference | -0.0015 | | **2.0349** | -0.4433 | | | -2.1092 |
| ICI, GCs | 461 | 17831 | 1.32 ( 1.21 - 1.45 ) |  | |  |  | | |  |
| ICI, no GCs | 10900 | 381555 | 1.47 ( 1.44 - 1.5 ) |  | |  |  | | |  |
| GCs, no ICI | 2732 | 148826 | 0.94 ( 0.9 - 0.98 ) |  | |  |  | | |  |
| Reproductive system and breast disorders | No ICI, no GCs | 314142 | 40386824 | reference | **0.005** | | 0.1633 | -3.0973 | | | -8.9785 |
| ICI, GCs | 35 | 18257 | 0.25 ( 0.18 - 0.35 ) |  | |  |  | | |  |
| ICI, no GCs | 720 | 391735 | 0.24 ( 0.22 - 0.25 ) |  | |  |  | | |  |
| GCs, no ICI | 422 | 151136 | 0.36 ( 0.33 - 0.4 ) |  | |  |  | | |  |
| Respiratory, thoracic and mediastinal disorders | No ICI, no GCs | 1897739 | 38803227 | reference | -0.003 | | **2.1269** | -0.2588 | | | -1.7399 |
| ICI, GCs | 1209 | 17083 | 1.44 ( 1.36 - 1.53 ) |  | |  |  | | |  |
| ICI, no GCs | 27259 | 365196 | 1.53 ( 1.51 - 1.54 ) |  | |  |  | | |  |
| GCs, no ICI | 7016 | 144542 | 0.99 ( 0.96 - 1.01 ) |  | |  |  | | |  |
| Skin and subcutaneous tissue disorders | No ICI, no GCs | 2286828 | 38414138 | reference | **0.0089** | | **1.1582** | -0.1496 | | | 1.115 |
| ICI, GCs | 1064 | 17228 | 1.04 ( 0.98 - 1.1 ) |  | |  |  | | |  |
| ICI, no GCs | 21843 | 370612 | 0.99 ( 0.98 - 1 ) |  | |  |  | | |  |
| GCs, no ICI | 7540 | 144018 | 0.88 ( 0.86 - 0.9 ) |  | |  |  | | |  |
| Social circumstances | No ICI, no GCs | 176414 | 40524552 | reference | **0.0029** | | 0.1858 | -2.6445 | | | -5.7035 |
| ICI, GCs | 29 | 18263 | 0.37 ( 0.26 - 0.53 ) |  | |  |  | | |  |
| ICI, no GCs | 396 | 392059 | 0.23 ( 0.21 - 0.26 ) |  | |  |  | | |  |
| GCs, no ICI | 301 | 151257 | 0.46 ( 0.41 - 0.52 ) |  | |  |  | | |  |
| Surgical and medical procedures | No ICI, no GCs | 587135 | 40113831 | reference | **0.0085** | | 0.8007 | -2.029 | | | -10.0573 |
| ICI, GCs | 101 | 18191 | 0.38 ( 0.31 - 0.46 ) |  | |  |  | | |  |
| ICI, no GCs | 3039 | 389416 | 0.53 ( 0.52 - 0.55 ) |  | |  |  | | |  |
| GCs, no ICI | 561 | 150997 | 0.26 ( 0.23 - 0.28 ) |  | |  |  | | |  |
| Vascular disorders | No ICI, no GCs | 813064 | 39887902 | reference | **0.0023** | | 0.973 | -0.3424 | | | -0.0476 |
| ICI, GCs | 365 | 17927 | 1 ( 0.9 - 1.11 ) |  | |  |  | | |  |
| ICI, no GCs | 7295 | 385160 | 0.93 ( 0.91 - 0.95 ) |  | |  |  | | |  |
| GCs, no ICI | 2892 | 148666 | 0.95 ( 0.92 - 0.99 ) |  | |  |  | | |  |

**Table 3** Summary of methods used to analyze DDIs for all SOCs

| **SOC** | **ROR** | **Additive Model** | **Multiplicative Model** | **Ω Shrinkage Measure Model** | **Chi-square Statistics Model** |
| --- | --- | --- | --- | --- | --- |
| Blood and lymphatic system disorders | - | - | √ | - | - |
| Cardiac disorders | - | √ | √ | - | - |
| Congenital, familial and genetic disorders | - | √ | - | - | - |
| Ear and labyrinth disorders | - | √ | - | - | - |
| Endocrine disorders | - | - | √ | - | - |
| Eye disorders | - | √ | - | - | - |
| Gastrointestinal disorders | √ | √ | √ | √ | √ |
| General disorders and administration site conditions | - | - | - | - | - |
| Hepatobiliary disorders | - | - | √ | - | - |
| Immune system disorders | - | - | - | - | - |
| Infections and infestations | - | - | - | - | - |
| Injury, poisoning and procedural complications | - | √ | - | - | - |
| Investigations | √ | √ | √ | √ | √ |
| Metabolism and nutrition disorders | √ | √ | √ | - | √ |
| Musculoskeletal and connective tissue disorders | - | √ | - | - | - |
| Neoplasms benign, malignant and unspecified (incl cysts and polyps) | - | - | √ | - | - |
| Nervous system disorders | - | √ | - | - | - |
| Pregnancy, puerperium and perinatal conditions | - | - | - | - | - |
| Product issues | - | √ | - | - | - |
| Psychiatric disorders | - | √ | - | - | - |
| Renal and urinary disorders | - | - | √ | - | - |
| Reproductive system and breast disorders | - | √ | - | - | - |
| Respiratory, thoracic and mediastinal disorders | - | - | √ | - | - |
| Skin and subcutaneous tissue disorders | - | √ | √ | - | - |
| Social circumstances | - | √ | - | - | - |
| Surgical and medical procedures | - | √ | - | - | - |
| Vascular disorders | - | √ | - | - | - |

**Table 4** Disproportionality analyses and drug interaction approaches for the various drug combinations

| SOC | **Drug-drug  interaction of  interest** | **Exposure** | **Cases** | **Non-cases** | **ROR(95%Cl)** | **Additive Model** | **Multiplicative Model** | **Ω Shrinkage Measure Model** | **Chi-square Statistics Model** |
| --- | --- | --- | --- | --- | --- | --- | --- | --- | --- |
| Metabolism and nutrition disorders | PD-1+GCs | NO PD-1, no GCs | 837947 | 39967270 | reference | 0.000670048 | 3.282389721 | -0.234945226 | 0.474179681 |
| Metabolism and nutrition disorders | PD-1+GCs | PD-1, GCs | 609 | 12370 | 2.33 ( 2.15 - 2.53 ) |  |  |  |  |
| Metabolism and nutrition disorders | PD-1+GCs | PD-1, NO GCs | 11538 | 281480 | 1.95 ( 1.92 - 1.99 ) |  |  |  |  |
| Metabolism and nutrition disorders | PD-1+GCs | GCs, No PD-1 | 4168 | 147889 | 1.33 ( 1.29 - 1.38 ) |  |  |  |  |
| Metabolism and nutrition disorders | PDL1+GCs | NO PD-L1, no GCs | 847603 | 40194919 | reference | 0.011839743 | 3.312818513 | -0.079433681 | 3.686791076 |
| Metabolism and nutrition disorders | PDL1+GCs | PD-L1, GCs | 215 | 3782 | 2.69 ( 2.34 - 3.09 ) |  |  |  |  |
| Metabolism and nutrition disorders | PDL1+GCs | PD-L1, no GCs | 2205 | 60710 | 1.72 ( 1.65 - 1.79 ) |  |  |  |  |
| Metabolism and nutrition disorders | PDL1+GCs | GCs, No PD-L1 | 4239 | 149598 | 1.34 ( 1.3 - 1.38 ) |  |  |  |  |
| Metabolism and nutrition disorders | CTLA4+GCs | No CTLA-4, no GCs | 847937 | 40223212 | reference | -0.00467471 | 5.324683877 | -0.727253425 | -0.79950199 |
| Metabolism and nutrition disorders | CTLA4+GCs | CTLA-4, GCs | 109 | 1828 | 2.82 ( 2.33 - 3.42 ) |  |  |  |  |
| Metabolism and nutrition disorders | CTLA4+GCs | CTLA-4, no GCs | 1971 | 34551 | 2.7 ( 2.58 - 2.83 ) |  |  |  |  |
| Metabolism and nutrition disorders | CTLA4+GCs | GCs, no CTLA-4 | 4245 | 149418 | 1.35 ( 1.31 - 1.39 ) |  |  |  |  |
| Investigations | PD-1+GCs | NO PD-1, no GCs | 2383915 | 38421302 |  | 0.025599219 | 1.98704475 | 0.045951226 | 5.526609275 |
| Investigations | PD-1+GCs | PD-1,GCs | 1027 | 11952 | 1.38 ( 1.3 - 1.48 ) |  |  |  |  |
| Investigations | PD-1+GCs | PD-1, NO GCs | 19507 | 273511 | 1.15 ( 1.13 - 1.17 ) |  |  |  |  |
| Investigations | PD-1+GCs | GCs, No PD-1 | 6900 | 145157 | 0.77 ( 0.75 - 0.78 ) |  |  |  |  |
| Investigations | PDL1+GCs | NO PD-L1, no GCs | 2399105 | 38643417 | reference | 0.010765307 | 2.251376269 | -0.413383149 | -0.520097847 |
| Investigations | PDL1+GCs | PD-L1, GCs | 305 | 3692 | 1.33 ( 1.18 - 1.5 ) |  |  |  |  |
| Investigations | PDL1+GCs | PD-L1, no GCs | 4938 | 57977 | 1.37 ( 1.33 - 1.41 ) |  |  |  |  |
| Investigations | PDL1+GCs | GCs, No PD-L1 | 7001 | 146836 | 0.77 ( 0.75 - 0.79 ) |  |  |  |  |
| Investigations | CTLA4+GCs | No CTLA-4, no GCs | 2402222 | 38668927 | reference | 0.020917208 | 1.33385281 | -0.468985345 | 0.864928791 |
| Investigations | CTLA4+GCs | CTLA-4, GCs | 123 | 1814 | 1.09 ( 0.91 - 1.31 ) |  |  |  |  |
| Investigations | CTLA4+GCs | CTLA-4, no GCs | 2035 | 34487 | 0.95 ( 0.91 - 0.99 ) |  |  |  |  |
| Investigations | CTLA4+GCs | GCs, no CTLA-4 | 6969 | 146694 | 0.76 ( 0.75 - 0.78 ) |  |  |  |  |
| Gastrointestinal disorders | PD-1+GCs | NO PD-1, no GCs | 3427470 | 37377747 | reference | 0.043177166 | 2.259271716 | 0.037035644 | 5.478191415 |
| Gastrointestinal disorders | PD-1+GCs | PD-1,GCs | 1435 | 11544 | 1.36 ( 1.28 - 1.43 ) |  |  |  |  |
| Gastrointestinal disorders | PD-1+GCs | PD-1, NO GCs | 28028 | 264990 | 1.15 ( 1.14 - 1.17 ) |  |  |  |  |
| Gastrointestinal disorders | PD-1+GCs | GCs, No PD-1 | 8474 | 143583 | 0.64 ( 0.63 - 0.66 ) |  |  |  |  |
| Gastrointestinal disorders | PDL1+GCs | NO PD-L1, no GCs | 3450788 | 37591734 | reference | 0.052149281 | 2.12649284 | 0.037042735 | 5.049560607 |
| Gastrointestinal disorders | PDL1+GCs | PD-L1, GCs | 450 | 3547 | 1.38 ( 1.25 - 1.53 ) |  |  |  |  |
| Gastrointestinal disorders | PDL1+GCs | PD-L1, no GCs | 5579 | 57336 | 1.06 ( 1.03 - 1.09 ) |  |  |  |  |
| Gastrointestinal disorders | PDL1+GCs | GCs, No PD-L1 | 8590 | 145247 | 0.64 ( 0.63 - 0.66 ) |  |  |  |  |
| Gastrointestinal disorders | CTLA4+GCs | No CTLA-4, no GCs | 3451388 | 37619761 | reference | 0.029361176 | 4.290250334 | -0.379977147 | 0.107497134 |
| Gastrointestinal disorders | CTLA4+GCs | CTLA-4, GCs | 276 | 1661 | 1.81 ( 1.6 - 2.06 ) |  |  |  |  |
| Gastrointestinal disorders | CTLA4+GCs | CTLA-4, no GCs | 5161 | 31361 | 1.8 ( 1.74 - 1.85 ) |  |  |  |  |
| Gastrointestinal disorders | CTLA4+GCs | GCs, no CTLA-4 | 8582 | 145081 | 0.64 ( 0.63 - 0.66 ) |  |  |  |  |

**Table 5** Summary of methods used to analyse DDI in 3 SOCs

| SOC | **Exposure** | **ROR** | **Additive Model** | **Multiplicative Model** | **Ω Shrinkage Measure Model** | **Chi-square Statistics Model** |
| --- | --- | --- | --- | --- | --- | --- |
| Metabolism and nutrition disorders | PD-1+GCs | √ | √ | √ | - | - |
| Metabolism and nutrition disorders | PDL1+GCs | √ | √ | √ | - | √ |
| Metabolism and nutrition disorders | CTLA4+GCs | - | - | √ | - | - |
| Investigations | PD-1+GCs | √ | √ | √ | √ | √ |
| Investigations | PDL1+GCs | - | √ | √ | - | - |
| Investigations | CTLA4+GCs | - | √ | √ | - | - |
| Gastrointestinal disorders | PD-1+GCs | √ | √ | √ | √ | √ |
| Gastrointestinal disorders | PDL1+GCs | √ | √ | √ | √ | √ |
| Gastrointestinal disorders | CTLA4+GCs | - | √ | √ | - | - |
